# Supplementary material
Source: publisher figshare collection journal article supplement (https://karger.figshare.com/articles/dataset/_/5121721)
Supplement: Supplementary file 1 [file 1 › 000324396_sm_Suppl._Appendix.pdf]

## ESM File

### Appendix 1: Questionnaire

#### NEPHROLOGIST DIALYSIS SURVEY

##### **Section 1:**

In your CURRENT practice, please rate the relative importance of these factors:

*Please indicate the number corresponding to your answer:*

- |                                              |                                              |
|----------------------------------------------|----------------------------------------------|
| 1 A very important reason in favor of HD     | 3 Does not affect decision of HD or PD       |
| 2 A somewhat important reason in favor of HD | 4 A somewhat important reason in favor of PD |
| 5 A very important reason in favor of PD     |                                              |

##### DEMOGRAPHIC DATA OF DIALYSIS PATIENT

1. AGE
  - a. Age <10 yrs
  - b. Ages 10-70 yrs
  - c. Age older than 70 yrs
2. SEX
  - a. Male
  - b. Female
3. WEIGHT
  - a. < 70KG
  - b. ≥ 70 KG
4. ECONOMIC STATUS
  - a. Can afford HD 3x a week or CAPD 2li x 3/day
  - b. Cannot afford the above prescription
  - c. Has clean room in house for dialysis
5. EDUCATIONAL STATUS
  - a. No formal schooling
  - b. Finished elementary
  - c. Finished high school
  - d. Finished college
  - e. Postgraduate
  - f. Vocational course
6. SOCIAL SUPPORT SYSTEM
  - a. SELF
    - i. Independent
    - ii. Relies heavily on family members/aides for health needs
  - b. SUPPORT SYSTEM
    - i. Has trainable family members/aides for health needs
    - ii. None available
7. EMPLOYMENT STATUS
  - a. Presently working/On leave from work
  - b. No permanent job
  - c. Not willing to work anymore due to sickness

1 – 2 – 3 – 4 – 5

##### PAST MEDICAL HISTORY

1. DM
2. Heart disease that is not CHF
3. CHF
4. Prior abdominal surgery
5. Prior pelvic surgery (e.g. hysterectomy)

#### PHYSICAL STATUS

1. Poor visual acuity
2. Difficulty/Inability to walk
3. Limited finger dexterity (Ex. Deforming arthritis)
4. Poor personal hygiene of patient

#### DIALYSIS FACTORS

1. Less infection
2. Possibility of bacteremia
3. Feeling of "guilt" or "responsibility" in case of infection
4. Preservation of residual renal function
5. Preserving body image
6. More liberal diet
7. More flexible lifestyle/ schedule
8. Lower cost
9. Patient lives far from HD center
10. Patient lives far from center selling PD supplies
11. Your clinic is far from HD center
12. Your clinic is far from center selling PD supplies

#### PHYSICIAN FACTORS

1. At least 1 month from 1<sup>st</sup> nephrology encounter to dialysis initiation
2. Ease of explaining the method of dialysis to the patient
3. Degree of patient preparation needed (access vs training)
4. Surgical skill for vascular access in your hospital
5. Surgical skill for PD access in your hospital
6. Amount of PF received

**Section 2:**

When you consider the cost of dialysis, do you include:

- a. Cost of access (HD or PD) placement and its complications? \_\_\_\_ Yes \_\_\_\_ No
- b. Cost of transportation? \_\_\_\_ Yes \_\_\_\_ No
- c. Cost of medications (ex: Epo, BP meds)? \_\_\_\_ Yes \_\_\_\_ No

In your current practice, assuming there are no contraindications to either modality, all patient factors being equal and a HD unit exists in your area, how would you prescribe dialysis modality to a new ESRD patient? (note: transplantation is not an option at this point)

- \_\_\_\_ I am more likely to recommend HD.
- \_\_\_\_ I am more likely to recommend PD.
- \_\_\_\_ I would not recommend either HD or PD; I would let the patient choose.

How much do the following factors affect your recommendation about dialysis modality?

*Please indicate the number corresponding to your answer:*

- |                        |                        |                       |
|------------------------|------------------------|-----------------------|
| 1 Not at all important | 3 Moderately important | 5 Extremely important |
| 2 Slightly important   | 4 Quite important      |                       |

- 1. Data from HD vs PD studies: Survival
- 2. Data from HD vs PD studies: Morbidity
- 3. Data from HD vs PD studies: Quality of life
- 4. Preservation of residual renal function
- 5. Ease of explaining the method of dialysis to the patient
- 6. Amount of patient preparation needed (access, training)
- 7. Amount of time from 1<sup>st</sup> nephrology encounter to dialysis initiation
- 8. Availability of dialysis support staff
- 9. Preference of patient's other MDs
- ~~10.~~ Amount of PF received
- 11. Cost of DIALYSIS ONLY to patient
- 12. OVERALL cost to patient (dialysis, medications, transportation, etc.)
- 13. Intelligence of patient and/or relatives
- 14. Patient's housing conditions
- 15. Patient and family preference

**Section 3:**

*Please indicate the number corresponding to your answer:*

- |                    |                        |         |
|--------------------|------------------------|---------|
| 1 All the time     | 3 Some of the time     | 5 Never |
| 2 Most of the time | 4 A little of the time |         |

- 1. For a patient who undergoes emergent dialysis with HD, do you later discuss PD as a long-term dialysis option (i.e. "switching" modalities)?
- 2. For a patient who undergoes emergent dialysis with PD, do you later discuss HD as a long-term dialysis option?
- 3. When I recommend HD to a patient, I encounter resistance
- 4. When I recommend PD to a patient, I encounter resistance

**Section 4:**

Since PD is not widely used in the Phil, the following questions pertain to PD:

In your opinion, how much do the following factors influence incidence of infection in PD

*Please indicate the number corresponding to your answer:*

- |                        |                        |                       |
|------------------------|------------------------|-----------------------|
| 1 Not at all important | 3 Moderately important | 5 Extremely important |
| 2 Slightly important   | 4 Quite important      |                       |

1. Use of straight line vs twin bag system
2. Patient technique
3. Amount of training
4. Intelligence of patient or family member
5. Personal hygiene of patient
6. Cleanliness of house

**Section 5:****TELL US ABOUT YOURSELF AND YOUR PRACTICE**

1. Name (optional): \_\_\_\_\_
2. Date of birth (mm/dd/yyyy)\*: \_\_/\_\_/\_\_\_\_ Gender: M/ F  
(Please fill in. This will be used to check for duplication of entries during encoding.)
3. You are a
  - a. PSN Associate Member
  - b. PSN Diplomate
  - c. PSN Fellow
  - d. Other \_\_\_\_\_
4. Area of practice
  - a. Metro Manila \_\_\_\_\_
  - b. Outside Metro Manila, please specify: \_\_\_\_\_
5. Field of practice
  - a. Nephrology only
  - b. Nephrology/ Internal Medicine
  - c. Pediatric Nephrology only
6. How much of your professional time is spent with direct patient care/ clinical work?
  - a. <25% of the time
  - b. 26-50%
  - c. 51-75%
  - d. 76-100%
7. Dialysis patients compose what % of your practice?
  - a. I have no dialysis patients
  - b. 1-5%
  - c. 6-10%
  - d. 11-25%
  - e. 26-50%
  - f. 51-75%
  - g. 76-100%
8. Among your dialysis patients, what is the patient mix?
  - a. All HD
  - b. Mostly HD (please estimate %: \_\_\_\_\_)
  - c. About equal mix
  - d. Mostly PD (please estimate %: \_\_\_\_\_)
  - e. All PD
9. Do you have any financial investment in any dialysis clinics?
  - a. Yes
  - b. No

10. Are you a medical director in any free-standing dialysis units?
  - a. Yes
  - b. No
11. Do you work in any free-standing dialysis clinics?
  - a. Part-time
  - b. Full time
  - c. No
12. Is there a HD unit in your main area of practice?
  - a. Yes
  - b. No
13. Does a PD health care representative visit your clinic?
  - a. Yes
  - b. No
14. Do you actively participate in training fellows in nephrology?
  - a. <25% of the time
  - b. At least 25% of the time
  - c. No
15. Year graduated from Nephrology fellowship (yyyy): \_\_\_\_\_
16. Where did you do your Nephrology fellowship? \_\_\_\_\_
17. How many PD patients did you see/encounter during your fellowship?
  - a. <5
  - b. 5-10
  - c. 11-15
  - d. 16-20
  - e. 21-25
  - f. >25
18. How many HD patients did you see during your fellowship?
  - a. <5
  - b. 5-10
  - c. 11-15
  - d. 16-20
  - e. 21-25
  - f. >25

Thank you for answering these questions!

**If you have any additional comments or questions, please use the lower portion and back of this sheet.**
